# Supplementary material
Source: MDPI journal article supplement (https://www.mdpi.com/2673-5261/1/1/4)
Supplement: s1 [file s1]

# ROC analysis identifies baseline and dynamic NLR and dNLR cut-offs to predict ICI outcome in 402 advanced NSCLC patients

Supplementary

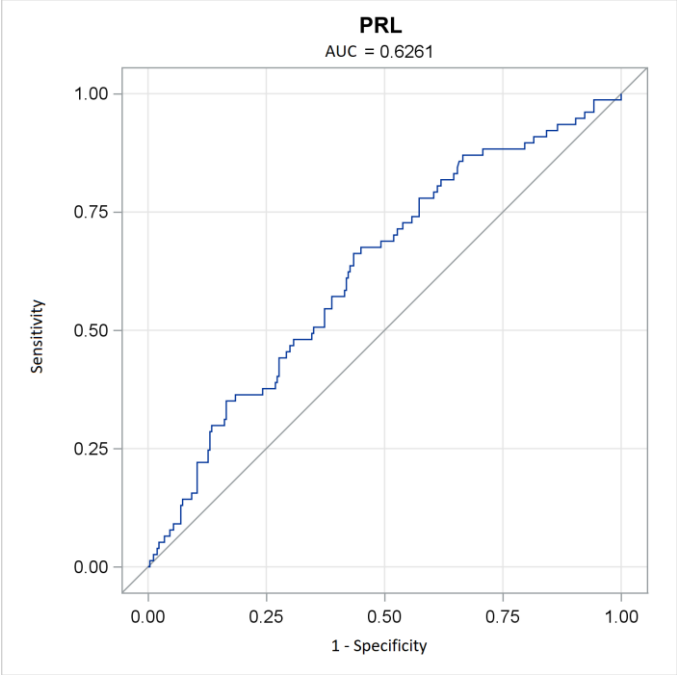

Figure S1. ROC curve for baseline PRL (platelets – lymphocytes).

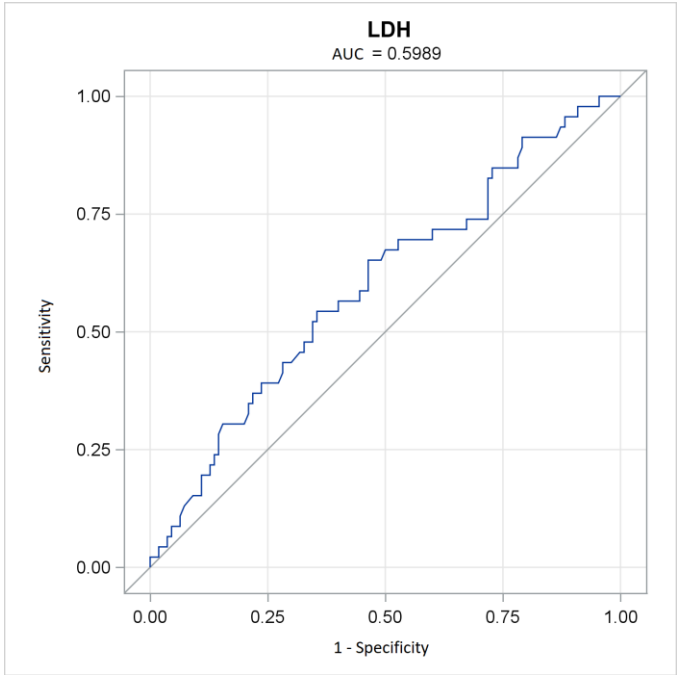

Figure S2. ROC curve for baseline LDH (lactate dehydrogenase).

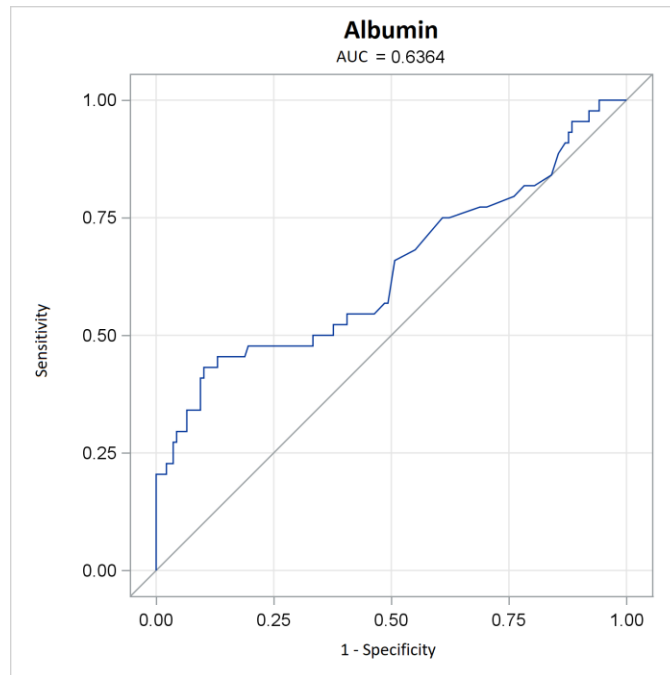

Figure S3. ROC curve for baseline serum albumin.

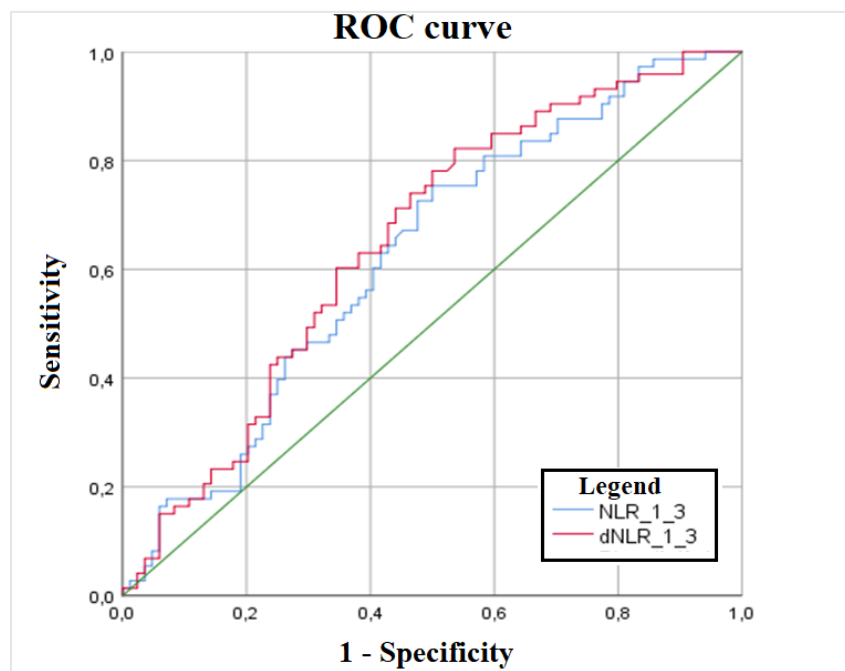

Figure S4. ROC curves for NLR e dNLR changing from baseline to cycle 3.
